# Supplementary material for: Stereoselective separation, configuration determination, and quantification of flavanone glycosides in Citrus using chiral HPLC-UV in combination with CD spectra
Source: Royal Society of Chemistry journal article supplement (doi:10.1039/d3ay01654d), 2023-01-01
Supplement: d3ay01654d1.pdf [file d3ay01654d1.pdf]

## Supplementary Materials

### Stereoselective separation, configuration determination, and quantification of flavanone glycosides in Citrus using chiral HPLC-UV in combination with CD spectra

Bingtong Jiang,<sup>a, b†</sup> Zhaokun Wang,<sup>b†</sup> Xuejiao Shi,<sup>b</sup> Ying Gao,<sup>b</sup> Jiayu Zhang<sup>\* b</sup> and Yanyun Che<sup>\*</sup>

<sup>a</sup>

<sup>a</sup>Engineering research center for homology of medicine and food beverage of Yunnan Province, College of Pharmaceutical Science, Yunnan University of Chinese Medicine, No. 1076 Yuhua Road, Chenggong District, Kunming 650500, Yunnan, China

<sup>b</sup>School of Pharmacy, Binzhou Medical University, 346 Guanhai Road Laishan District, Yantai 264003, China

E-mail: [zhangjiayu0615@163.com](mailto:zhangjiayu0615@163.com); [checpu@163.com](mailto:checpu@163.com)

Fig S1

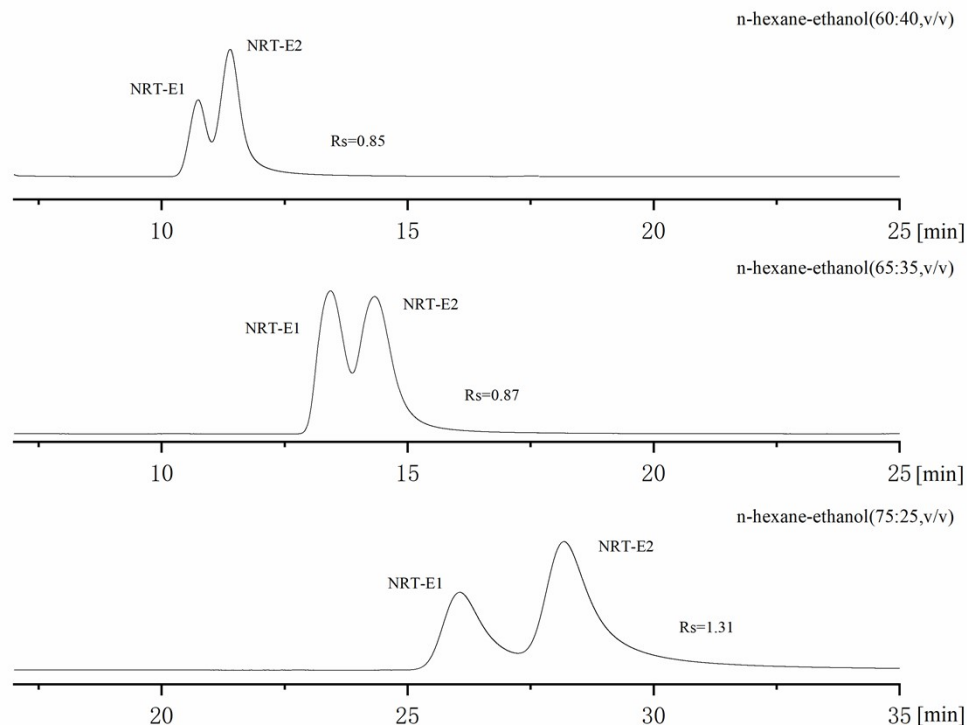

Fig. S1 Chromatograms of Narirutin with various mobile phases on Chiral INC column.

**Table S1**

| Analytes                                       | Detection instrument | Mobile phase                       | Rs                           | Extraction recovery (%) | RSD (%) | Ref  |
|------------------------------------------------|----------------------|------------------------------------|------------------------------|-------------------------|---------|------|
| naringin, neohesperidin                        | Chiral-LC-CD         | n-hexane-CHCl <sub>3</sub> -ethano | -                            | -                       | -       | [16] |
| naringin, neohesperidin, narirutin, hesperidin | DM-β-CD              | 0.1 M borate buffer                | ≤0.54<br>≤2.48<br>≤0.65<br>- | -                       | -       | [23] |
| naringin, neohesperidin                        | Chiral-LC-CD         | n-hexane-ethanol                   | ≤9.2<br>≤4.1                 | -                       | -       | [24] |
| naringin, hesperidin                           | nano-LC-UV           | MeOH-IPA                           | ≤2.25<br>-                   | -                       | -       | [14] |
| naringin                                       | Chiral-SFC           | ethanol-methanol                   | ≤5.1                         | -                       | 2.6-2.7 | [15] |

23. N. Gel-Moreto, R. Streich and R. Galensa, *Journal of Chromatography A*, 2001, **925**, 279–289.

24. S. Caccamese and R. Chillemi, *J Chromatogr A*, 2010, **1217**, 1089-1093.

Comparison with other methods.

**Table 1 naringin-1s-no-sugar-energies-blin**

| Conf ID | Energy (Hartree) | ΔE (Hartree) | Boltzmann Factor | Population (%) |
|---------|------------------|--------------|------------------|----------------|
| 1       | -994.0833458     | 0            | 1                | 15.50          |
| 2       | -994.0833449     | 8.94E-07     | 0.999053998      | 15.49          |
| 3       | -994.0832688     | 7.7065E-05   | 0.921653204      | 14.29          |
| 4       | -994.0831747     | 0.00017109   | 0.834327181      | 12.94          |
| 5       | -994.0831743     | 0.00017154   | 0.833933333      | 12.93          |
| 6       | -994.083107      | 0.00023884   | 0.776586685      | 12.04          |
| 7       | -994.0831069     | 0.00023892   | 0.776513518      | 12.04          |
| 8       | -994.0817981     | 0.00154774   | 0.194262665      | 3.01           |
| 9       | -994.0799827     | 0.0033631    | 0.028427257      | 0.44           |
| 10      | -994.0798523     | 0.00349353   | 0.024761019      | 0.38           |

|    |              |            |             |      |
|----|--------------|------------|-------------|------|
| 11 | -994.0797297 | 0.00361616 | 0.02174617  | 0.34 |
| 12 | -994.0796223 | 0.00372349 | 0.019410455 | 0.30 |
| 13 | -994.079621  | 0.00372484 | 0.019382898 | 0.30 |

Table 2 neohesperidin-1s-no-sugar-energies-blin

| Conf ID | Energy (Hartree) | $\Delta E$ (Hartree) | Boltzmann Factor | Population (%) |
|---------|------------------|----------------------|------------------|----------------|
| 1       | -1108.597349     | 0                    | 1                | 19.17          |
| 2       | -1108.597092     | 0.00025627           | 0.762384021      | 14.61          |
| 3       | -1108.596927     | 0.00042188           | 0.639779996      | 12.26          |
| 4       | -1108.596925     | 0.00042404           | 0.638318668      | 12.24          |
| 5       | -1108.59692      | 0.00042833           | 0.635426198      | 12.18          |
| 6       | -1108.596807     | 0.00054169           | 0.563566496      | 10.80          |
| 7       | -1108.59666      | 0.00068881           | 0.482284444      | 9.24           |
| 8       | -1108.596607     | 0.00074138           | 0.456176542      | 8.74           |
| 9       | -1108.593785     | 0.00356408           | 0.022978921      | 0.44           |
| 10      | -1108.593456     | 0.00389261           | 0.016228567      | 0.31           |
